# Supplementary material for: Absolute configuration determination through the unique intramolecular excitonic coupling in the circular dichroisms of o,p′-DDT and o,p′-DDD. A combined experimental and theoretical study
Source: Royal Society of Chemistry journal article supplement (doi:10.1039/c6pp00438e), 2017-02-02
Supplement: c6pp00438e1.pdf [file c6pp00438e1.pdf]

## Supporting Information for

### **Absolute Configuration Determination through the Unique Intramolecular Excitonic Coupling in the Circular Dichroisms of *o,p'*-DDT and *o,p'*-DDD. A Combined Experimental and Theoretical Study.**

Hiroki Tanaka,<sup>a</sup> Yoshihisa Inoue,<sup>a</sup> Takeshi Nakano<sup>b</sup> and Tadashi Mori\*<sup>a</sup>

a. Department of Applied Chemistry, Graduate School of Engineering, Osaka University, 2-1 Yamada-oka, Suita, Osaka, 565-0871, Japan

b. Research Center for Environmental Preservation, Osaka University, 2-4, Yamada-oka, Suita, Osaka 565-0871, Japan

#### **Contents**

1. General experimental details (page S2).
2. Typical chiral HPLC profiles for optical resolution of *o,p'*-**DDT** and *o,p'*-**DDD** (Figure S1, page S3).
2. Experimental CD spectra of both enantiomers of *o,p'*-**DDT** and *o,p'*-**DDD** (Figure S2, page S4).
3. Calculated CD spectra of conformers of *o,p'*-**DDD** (Figure S3, page S4).
4. Optimized geometries of *o,p'*-**DDT** and *o,p'*-**DDD**. (Table S1, pages S5-S8).

## General Experimental Details

Optical resolution of *o,p'*-DDT and *o,p'*-DDD were performed by chiral HPLC using Daicel Chiralcel OJ-H column (4.6 mm  $\phi$   $\times$  40 cm) under the following conditions: eluent: 9 : 1 mixture of hexane/2-propanol, flow rate: 0.5 mL min<sup>-1</sup>, temperature: 38 °C, UV detector at 291 nm. Experimental circular dichroism (CD) spectra were measured in a conventional quartz cell (light path 1 cm) fitted with a temperature controller for hexane (spectroscopic grade) solutions of *o,p'*-DDT and *o,p'*-DDD on a JASCO J-720WI Spectropolarimeter under the following conditions: bandwidth, 1 nm; scan rate, 50 nm min<sup>-1</sup>, response, 4 sec; accumulation, 4 times. Optical rotations were measured in a thermostated conventional quartz cell ( $\Phi$  = 1.8 mm,  $l$  = 1 dm) at the sodium-D line (589.3 nm) by using a JASCO DIP-1000 Digital Polarimeter fitted with a temperature controller.

All calculations were performed on Linux-PCs by using Gaussian 09<sup>S1</sup> or Turbomole 7.0<sup>S2</sup> program suite. Geometries were fully optimized at the dispersion-corrected density functional theory (3rd generation, DFT-D3 with BJ damping), with AO basis-set of valence triple- $\xi$  quality (in standard notation: H, [3s1p]; C, [5s3p2d1f]; Cl, [5s5p2d1f]) at the TPSS-D3/def2-TZVP level. The resolution of identity (RI) approximation was employed and the corresponding auxiliary basis-sets were taken from the Turbomole basis-set library. The numerical quadrature grid m5 was employed and the convergence criterion for the optimization regarding the change of total energy between two subsequent optimization cycles was set to  $10^{-7} E_h$ . Subsequent single-point energy calculations were performed with the spin-component-scaled (SCS)-MP2 method with a def2-TZVPP basis-set (in standard notation: H, [3s2p1d]; C, [5s3p2d1f]; Cl [5s5p3d1f]). The method has been shown to provide the most accurate relative energies (comparable to the computationally highly demanding CCSD(T) calculations). All excited-state calculations were performed with the above DFT-D3 optimized ground-state geometries, thus corresponding to the vertical transition approximation. The CD spectrum was simulated at the RI-CC2/def2-TZVP or SAC-CI/B95(d) level. Gaussian functions for each transition where the width of the band at 1/e height is fixed at 0.4 eV. The overall excitation energies obtained by the RI-CC2 method were shifted by 0.3 eV.

---

(S1) Gaussian 09, Revision D.01, Frisch, M. J.; Trucks, G. W.; Schlegel, H. B.; Scuseria, G. E.; Robb, M. A.; Cheeseman, J. R.; Scalmani, G.; Barone, V.; Mennucci, B.; Petersson, G. A.; Nakatsuji, H.; Caricato, M.; Li, X.; Hratchian, H. P.; Izmaylov, A. F.; Bloino, J.; Zheng, G.; Sonnenberg, J. L.; Hada, M.; Ehara, M.; Toyota, K.; Fukuda, R.; Hasegawa, J.; Ishida, M.; Nakajima, T.; Honda, Y.; Kitao, O.; Nakai, H.; Vreven, T.; Montgomery, J. A., Jr.; Peralta, J. E.; Ogliaro, F.; Bearpark, M.; Heyd, J. J.; Brothers, E.; Kudin, K. N.; Staroverov, V. N.; Kobayashi, R.; Normand, J.; Raghavachari, K.; Rendell, A.; Burant, J. C.; Iyengar, S. S.; Tomasi, J.; Cossi, M.; Rega, N.; Millam, J. M.; Klene, M.; Knox, J. E.; Cross, J. B.; Bakken, V.; Adamo, C.; Jaramillo, J.; Gomperts, R.; Stratmann, R. E.; Yazyev, O.; Austin, A. J.; Cammi, R.; Pomelli, C.; Ochterski, J. W.; Martin, R. L.; Morokuma, K.; Zakrzewski, V. G.; Voth, G. A.; Salvador, P.; Dannenberg, J. J.; Dapprich, S.; Daniels, A. D.; Farkas, Ö.; Foresman, J. B.; Ortiz, J. V.; Cioslowski, J.; Fox, D. J. Gaussian, Inc., Wallingford CT, 2009.

(S2) Turbomole V7.0 2015, a development of University of Karlsruhe and Forschungszentrum Karlsruhe GmbH, 1989-2007, Turbomole GmbH, since 2007; available from <http://www.turbomole.com>.

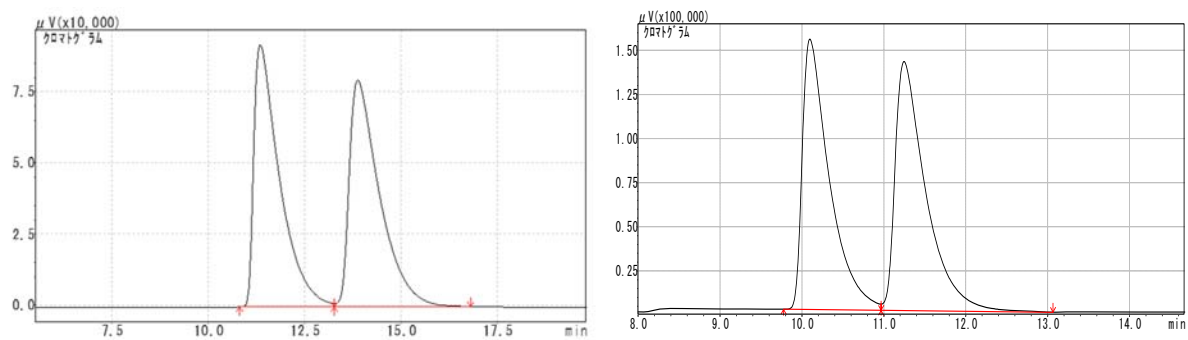

**Figure S1.** Typical chiral HPLC charts for optical resolution of *o,p'*-DDT (left) and *o,p'*-DDD (right).

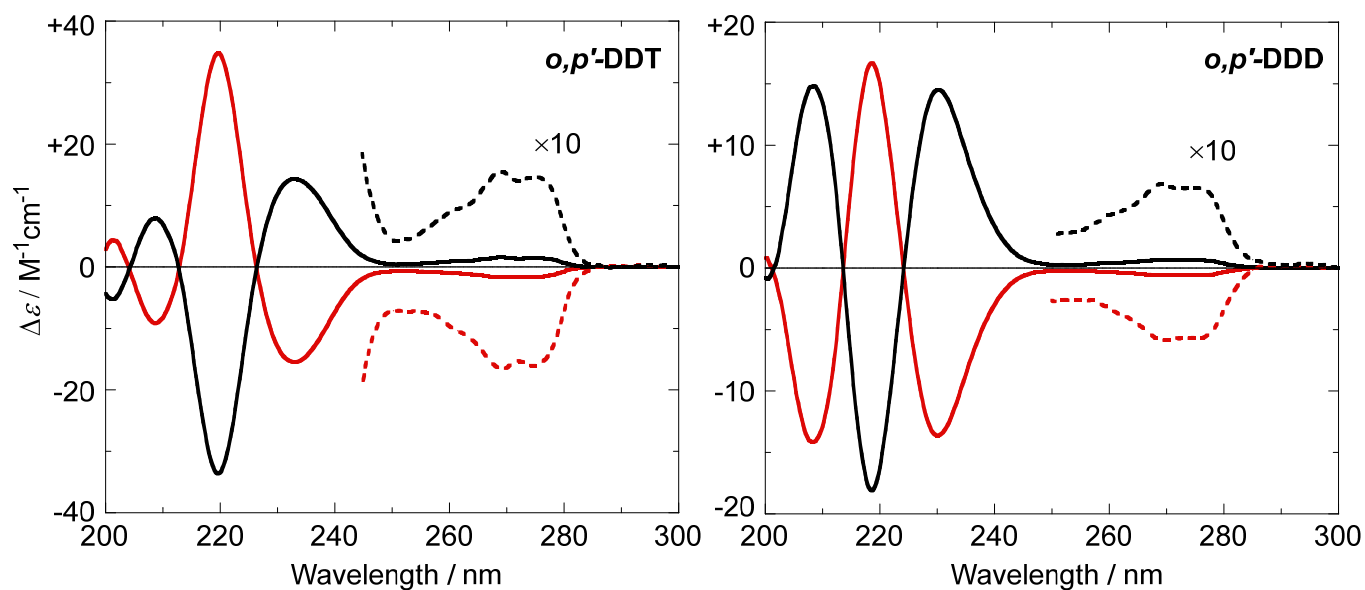

**Figure S2.** Experimental CD spectra of *o,p'*-DDT (left) and *o,p'*-DDD (right) in hexane at 25 °C. The 1st and 2nd elutes in chiral HPLC are shown in red and black lines, respectively.

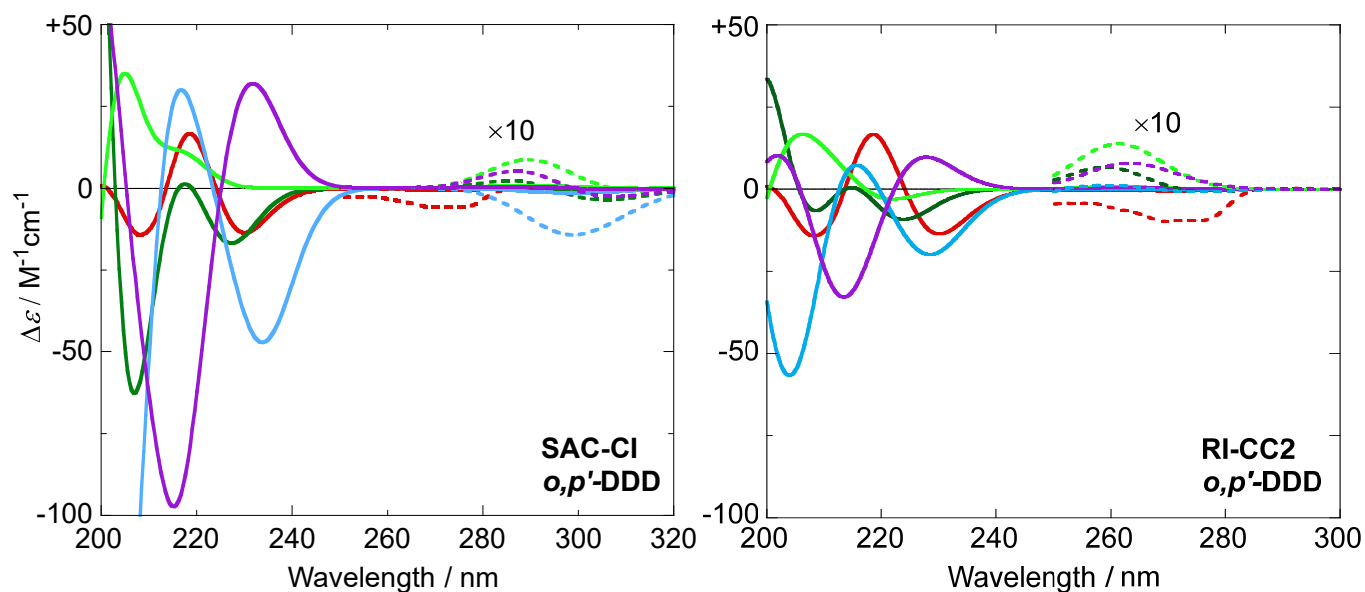

**Figure S3.** Comparison of experimental (red) and SAC-CI (left) and RI-CC2 (0.3 eV red-shifted, right) predicted CD spectra of various conformers of (*S*)-*o,p'*-DDT. Light blue: *t/r*, green: *g-/r*, light green: *g+/r* and purple: *t/s*.

**TABLE S1.** Optimized Geometries of *o,p'*-DDT and *o,p'*-DDD at the DFT-D3(BJ)-TPSS/def2-TZVP level.

| <b>(s)-o,p'-DDT</b> |                      |            |            | <b>(r)-o,p'-DDT</b> |                      |            |            |
|---------------------|----------------------|------------|------------|---------------------|----------------------|------------|------------|
| E(DFT)              | = -2840.420380952 au |            |            | E(DFT)              | = -2840.414166842 au |            |            |
| E(SCSMP2)           | = -2836.193186746 au |            |            | E(SCSMP2)           | = -2836.187287172 au |            |            |
| C                   | 0.8832322            | 0.7449711  | -0.0148504 | C                   | 0.7686447            | 0.8892242  | 0.0517556  |
| C                   | 2.4353570            | 0.6873713  | -0.0328450 | C                   | 2.3183053            | 0.9788919  | -0.0011886 |
| H                   | 0.7092570            | 1.8258692  | 0.0561228  | H                   | 0.4876445            | 1.9387960  | 0.1776057  |
| Cl                  | 3.0486953            | 1.5978011  | -1.4622946 | Cl                  | 2.7971293            | 1.8979756  | -1.4670281 |
| C                   | 0.1572377            | 0.3017316  | -1.2842446 | C                   | 0.0890279            | 0.4219096  | -1.2278992 |
| C                   | -1.1919921           | 0.6669899  | -1.3680593 | C                   | -1.0234074           | 1.1579996  | -1.6537964 |
| C                   | -1.9719870           | 0.3207073  | -2.4667893 | C                   | -1.7532294           | 0.7870299  | -2.7795544 |
| C                   | -1.3875917           | -0.3999762 | -3.5058882 | C                   | -1.3577360           | -0.3389124 | -3.4979467 |
| C                   | -0.0467506           | -0.7699014 | -3.4513069 | C                   | -0.2510503           | -1.0860847 | -3.1021202 |
| C                   | 0.7178664            | -0.4185251 | -2.3407674 | C                   | 0.4630459            | -0.7050259 | -1.9679778 |
| H                   | -1.6477867           | 1.2222843  | -0.5519074 | H                   | -1.3277283           | 2.0376644  | -1.0924813 |
| H                   | -3.0167708           | 0.6061611  | -2.5198721 | H                   | -2.6130671           | 1.3646658  | -3.1004732 |
| H                   | 0.3950124            | -1.3320177 | -4.2666931 | H                   | 0.0500628            | -1.9552391 | -3.6766336 |
| H                   | 1.7538110            | -0.7311857 | -2.3084953 | H                   | 1.3302063            | -1.2879693 | -1.6816986 |
| C                   | 0.2728047            | 0.1645486  | 1.2602864  | C                   | 0.2560479            | 0.1507989  | 1.2787240  |
| C                   | 0.0112630            | 1.0671376  | 2.3043695  | C                   | -0.3185027           | 0.8332970  | 2.3617950  |
| C                   | -0.5626992           | 0.6731710  | 3.5070490  | C                   | -0.8035093           | 0.1591147  | 3.4822591  |
| C                   | -0.9049687           | -0.6648089 | 3.6959147  | C                   | -0.7286578           | -1.2293896 | 3.5343049  |
| C                   | -0.6810045           | -1.5820298 | 2.6753351  | C                   | -0.1881264           | -1.9359327 | 2.4602104  |
| C                   | -0.1048967           | -1.1723168 | 1.4701341  | C                   | 0.2869526            | -1.2480121 | 1.3488944  |
| H                   | -0.7439662           | 1.4063065  | 4.2867506  | H                   | -1.2385605           | 0.7271180  | 4.2970615  |
| H                   | -1.3548124           | -0.9964123 | 4.6268995  | H                   | -1.1056714           | -1.7541378 | 4.4069922  |
| H                   | -0.9547550           | -2.6247126 | 2.7934360  | H                   | -0.1430462           | -3.0202739 | 2.4832437  |
| Cl                  | -2.3500032           | -0.8432496 | -4.8944323 | H                   | 0.6847305            | -1.8031111 | 0.5073327  |
| H                   | 0.2768430            | 2.1096031  | 2.1548201  | Cl                  | -0.4885733           | 2.5773515  | 2.3464875  |
| Cl                  | 0.0711603            | -2.4089062 | 0.2522713  | Cl                  | -2.2572699           | -0.8164002 | -4.9161212 |
| Cl                  | 3.1061334            | -0.9674283 | -0.0488561 | Cl                  | 3.1697272            | -0.6079066 | -0.0214952 |
| Cl                  | 3.0813112            | 1.5168170  | 1.4339128  | Cl                  | 2.8966112            | 1.8665581  | 1.4497477  |

**(t/s)-o,p'-DDD**

E(DFT) = -2380.795524934 au  
E(SCSMP2) = -2377.102332848 au

|    |            |            |            |
|----|------------|------------|------------|
| C  | -0.5301084 | -1.0289534 | 0.4201308  |
| C  | -1.0394522 | -2.1712897 | -0.4681240 |
| H  | -0.7674995 | -1.3079116 | 1.4491108  |
| Cl | -0.1926175 | -3.7081909 | -0.0789980 |
| C  | 0.9731979  | -0.8138897 | 0.3255181  |
| C  | 1.6474486  | -0.3489026 | 1.4596634  |
| C  | 3.0117394  | -0.0733216 | 1.4268325  |
| C  | 3.7129433  | -0.2699976 | 0.2387229  |
| C  | 3.0688712  | -0.7388605 | -0.9038157 |
| C  | 1.7023644  | -1.0060704 | -0.8520038 |
| H  | 1.0956511  | -0.1957652 | 2.3834846  |
| H  | 3.5284579  | 0.2850805  | 2.3103600  |
| H  | 3.6310257  | -0.8979650 | -1.8174230 |
| H  | 1.2192060  | -1.3878043 | -1.7467234 |
| C  | -1.2746790 | 0.2594669  | 0.0935608  |
| C  | -2.1087639 | 0.9008338  | 1.0176220  |
| C  | -2.7840587 | 2.0799227  | 0.7014205  |
| C  | -2.6333049 | 2.6405248  | -0.5635042 |
| C  | -1.8026009 | 2.0269646  | -1.5015911 |
| C  | -1.1317280 | 0.8561274  | -1.1653350 |
| H  | -3.4197777 | 2.5451296  | 1.4467292  |
| H  | -3.1604703 | 3.5572909  | -0.8095686 |
| H  | -1.6725873 | 2.4620855  | -2.4875985 |
| H  | -0.4664145 | 0.3944855  | -1.8900085 |
| Cl | -2.3365276 | 0.2461009  | 2.6260739  |
| Cl | 5.4253551  | 0.0675282  | 0.1830765  |
| H  | -0.8826214 | -1.9950670 | -1.5302229 |
| Cl | -2.8130489 | -2.3775518 | -0.2673891 |

**(t/r)-o,p'-DDD**

E(DFT) = -2380.797028499 au  
E(SCSMP2) = -2377.103910661 au

|    |            |            |            |
|----|------------|------------|------------|
| C  | -0.4959056 | -1.1028663 | 0.1465845  |
| C  | -1.1338223 | -2.0575614 | -0.8711058 |
| H  | -0.5814044 | -1.6147566 | 1.1115736  |
| Cl | -0.3522440 | -3.6764329 | -0.7743770 |
| C  | 0.9914352  | -0.8385162 | -0.0883441 |
| C  | 1.7200429  | -0.2763966 | 0.9665338  |
| C  | 3.0732745  | 0.0199943  | 0.8371886  |
| C  | 3.7101887  | -0.2532454 | -0.3720611 |
| C  | 3.0115774  | -0.8145939 | -1.4369996 |
| C  | 1.6557175  | -1.1016266 | -1.2881306 |
| H  | 1.2193276  | -0.0577023 | 1.9064496  |
| H  | 3.6298025  | 0.4545088  | 1.6602704  |
| H  | 3.5210129  | -1.0241698 | -2.3710384 |
| H  | 1.1290469  | -1.5418525 | -2.1272341 |
| C  | -1.2648570 | 0.2046567  | 0.3019473  |
| C  | -1.8138157 | 0.5026090  | 1.5563617  |
| C  | -2.4917299 | 1.6930179  | 1.8025193  |
| C  | -2.6405073 | 2.6257396  | 0.7777150  |
| C  | -2.1129064 | 2.3574013  | -0.4827209 |
| C  | -1.4351695 | 1.1606831  | -0.7080707 |
| H  | -2.9042322 | 1.8874544  | 2.7876693  |
| H  | -3.1673608 | 3.5591350  | 0.9508939  |
| H  | -2.2217637 | 3.0657227  | -1.2967695 |
| Cl | -0.8111501 | 0.8935371  | -2.3228865 |
| H  | -1.7062375 | -0.2312435 | 2.3508569  |
| Cl | 5.4089125  | 0.1114805  | -0.5514149 |
| H  | -1.0403729 | -1.7271621 | -1.9008897 |
| Cl | -2.8968593 | -2.2178142 | -0.5645211 |

**(g-/s)-o,p'-DDD**

E(DFT) = -2380.790723313 au  
E(SCSMP2) = -2377.096857288 au

|    |            |            |            |
|----|------------|------------|------------|
| C  | -0.4014888 | -0.7348734 | 0.8294018  |
| C  | -1.0820325 | -2.1055544 | 0.6782856  |
| H  | -0.4695749 | -0.5476294 | 1.9088531  |
| Cl | -0.1826226 | -3.3807704 | 1.5688128  |
| C  | 1.0676837  | -0.6305116 | 0.4592243  |
| C  | 1.7932074  | 0.4212606  | 1.0339985  |
| C  | 3.1367186  | 0.6253863  | 0.7371395  |
| C  | 3.7694663  | -0.2434844 | -0.1507514 |
| C  | 3.0760616  | -1.3008827 | -0.7316359 |
| C  | 1.7277098  | -1.4876221 | -0.4252535 |
| H  | 1.2961789  | 1.0976610  | 1.7253509  |
| H  | 3.6899779  | 1.4414971  | 1.1886911  |
| H  | 3.5835949  | -1.9728963 | -1.4149764 |
| H  | 1.1996518  | -2.3148882 | -0.8836760 |
| C  | -1.2538675 | 0.3245696  | 0.1427039  |
| C  | -2.4036603 | 0.8484939  | 0.7477314  |
| C  | -3.1979550 | 1.8078502  | 0.1224478  |
| C  | -2.8465261 | 2.2593309  | -1.1471963 |
| C  | -1.7084963 | 1.7536778  | -1.7758986 |
| C  | -0.9253965 | 0.8006064  | -1.1320572 |
| H  | -4.0762020 | 2.1900519  | 0.6310165  |
| H  | -3.4620116 | 3.0070604  | -1.6382793 |
| H  | -1.4291381 | 2.1026468  | -2.7651760 |
| H  | -0.0337058 | 0.4116036  | -1.6134866 |
| Cl | -2.8857542 | 0.3035861  | 2.3464012  |
| Cl | 5.4568907  | -0.0028636 | -0.5336590 |
| Cl | -1.3670990 | -2.6004449 | -1.0340918 |
| H  | -2.0716103 | -2.0728612 | 1.1260794  |

**(g-/r)-o,p'-DDD**

E(DFT) = -2380.797943022 au  
E(SCSMP2) = -2377.103909469 au

|    |            |            |            |
|----|------------|------------|------------|
| C  | -0.3208928 | 0.9055725  | -0.5413522 |
| C  | -1.1603738 | 2.1322801  | -0.1490247 |
| H  | -0.2045041 | 1.0483710  | -1.6252543 |
| Cl | -0.3768120 | 3.6649175  | -0.6959122 |
| C  | 1.0908595  | 0.7803731  | 0.0077015  |
| C  | 1.8755632  | -0.2631989 | -0.4984684 |
| C  | 3.1836004  | -0.4611084 | -0.0692842 |
| C  | 3.7191288  | 0.4086642  | 0.8787206  |
| C  | 2.9659324  | 1.4626094  | 1.3878216  |
| C  | 1.6555826  | 1.6437078  | 0.9483623  |
| H  | 1.4509091  | -0.9463281 | -1.2302822 |
| H  | 3.7819830  | -1.2761514 | -0.4612343 |
| H  | 3.3977270  | 2.1330315  | 2.1227921  |
| H  | 1.0776839  | 2.4598773  | 1.3635915  |
| C  | -1.1879709 | -0.3466986 | -0.4083205 |
| C  | -2.0131006 | -0.6567630 | -1.5017780 |
| C  | -2.8698730 | -1.7518307 | -1.5047410 |
| C  | -2.9148095 | -2.5858983 | -0.3884384 |
| C  | -2.1064528 | -2.3116141 | 0.7095462  |
| C  | -1.2563027 | -1.2024930 | 0.7029362  |
| H  | -3.4884408 | -1.9559459 | -2.3731327 |
| H  | -3.5713693 | -3.4504982 | -0.3692261 |
| H  | -2.1243517 | -2.9491318 | 1.5867823  |
| Cl | -0.2938501 | -0.9595354 | 2.1358999  |
| H  | -1.9645442 | -0.0128110 | -2.3776341 |
| Cl | 5.3599947  | 0.1733100  | 1.4321246  |
| Cl | -1.5930177 | 2.2206174  | 1.5911285  |
| H  | -2.1122988 | 2.0966749  | -0.6733238 |

**(g+/s)-o,p'-DDD**

E(DFT) = -2380.790803693 au  
E(SCSMP2) = -2377.097293883 au

|    |            |            |            |
|----|------------|------------|------------|
| C  | -0.4754010 | -0.6956042 | 0.8319571  |
| C  | -1.0424452 | -2.1215602 | 0.7256039  |
| H  | -0.6148800 | -0.4538280 | 1.8943242  |
| H  | -0.4895016 | -2.8090999 | 1.3617822  |
| C  | 1.0234528  | -0.6093015 | 0.5504718  |
| C  | 1.6081580  | 0.6631418  | 0.4819490  |
| C  | 2.9761718  | 0.8244035  | 0.2895313  |
| C  | 3.7801908  | -0.3069935 | 0.1586550  |
| C  | 3.2295833  | -1.5827355 | 0.2236461  |
| C  | 1.8558043  | -1.7254044 | 0.4222290  |
| H  | 0.9806881  | 1.5447939  | 0.5754130  |
| H  | 3.4167591  | 1.8140592  | 0.2385205  |
| H  | 3.8642729  | -2.4554815 | 0.1162288  |
| H  | 1.4500530  | -2.7306219 | 0.4539319  |
| C  | -1.2712156 | 0.3246421  | 0.0393442  |
| C  | -2.1572804 | 1.2238110  | 0.6478096  |
| C  | -2.8901184 | 2.1505850  | -0.0942489 |
| C  | -2.7381222 | 2.1955995  | -1.4767955 |
| C  | -1.8442279 | 1.3295706  | -2.1070809 |
| C  | -1.1182228 | 0.4151762  | -1.3513108 |
| H  | -3.5648739 | 2.8280151  | 0.4172839  |
| H  | -3.3093657 | 2.9157989  | -2.0549801 |
| H  | -1.7080443 | 1.3697522  | -3.1833524 |
| H  | -0.4058211 | -0.2437825 | -1.8354621 |
| C1 | -2.3578800 | 1.2514369  | 2.3887031  |
| C1 | 5.4978599  | -0.1191212 | -0.0941110 |
| C1 | -0.9597546 | -2.8257871 | -0.9320890 |
| C1 | -2.7358393 | -2.1714644 | 1.3120462  |

**(g+/r)-o,p'-DDD**

E(DFT) = -2380.795340549 au  
E(SCSMP2) = -2377.101392473 au

|    |            |            |            |
|----|------------|------------|------------|
| C  | -0.3935251 | -0.9379925 | 0.4495012  |
| C  | -1.1123615 | -2.1781041 | -0.1151230 |
| H  | -0.3407338 | -1.1659290 | 1.5228894  |
| H  | -0.4619867 | -3.0492667 | -0.0718895 |
| C  | 1.0572813  | -0.8135385 | -0.0054837 |
| C  | 1.8399115  | 0.1740453  | 0.6059720  |
| C  | 3.1812278  | 0.3394746  | 0.2793679  |
| C  | 3.7540256  | -0.5033350 | -0.6722766 |
| C  | 3.0021758  | -1.4982875 | -1.2892745 |
| C  | 1.6575682  | -1.6481145 | -0.9505555 |
| H  | 1.3871565  | 0.8365814  | 1.3393590  |
| H  | 3.7786301  | 1.1105892  | 0.7532663  |
| H  | 3.4593985  | -2.1433870 | -2.0314724 |
| H  | 1.0795611  | -2.4051178 | -1.4700410 |
| C  | -1.2072725 | 0.3471106  | 0.3590280  |
| C  | -2.0411560 | 0.6536599  | 1.4462910  |
| C  | -2.8411001 | 1.7907503  | 1.4752840  |
| C  | -2.8156959 | 2.6737171  | 0.3974082  |
| C  | -1.9867906 | 2.4108580  | -0.6881080 |
| C  | -1.1921809 | 1.2623498  | -0.7066185 |
| H  | -3.4739729 | 1.9862478  | 2.3353221  |
| H  | -3.4294615 | 3.5695307  | 0.3997196  |
| H  | -1.9420761 | 3.0900782  | -1.5324169 |
| C1 | -0.1716501 | 1.0592118  | -2.1092609 |
| H  | -2.0552576 | -0.0333334 | 2.2872305  |
| C1 | 5.4371806  | -0.3054810 | -1.0951821 |
| C1 | -1.6317525 | -2.0169110 | -1.8193743 |
| C1 | -2.5371432 | -2.6054067 | 0.9064377  |
